# Supplementary material for: Catalytic asymmetric hydrogenation reaction by in situ formed ultra-fine metal nanoparticles in live thermophilic hydrogen-producing bacteria
Source: Royal Society of Chemistry journal article supplement (doi:10.1039/d1nr00327e), 2021-01-01
Supplement: d1nr00327e1.pdf [file d1nr00327e1.pdf]

Journal Name

ARTICLE

Supporting Information

**Catalytic asymmetric hydrogenation reaction by *in situ* formed ultra-fine metal nanoparticles in live thermophilic hydrogen-producing bacteria**

Wei Bing, Faming Wang, Yuhuan Sun, Jinsong Ren, and Xiaogang Qu\*

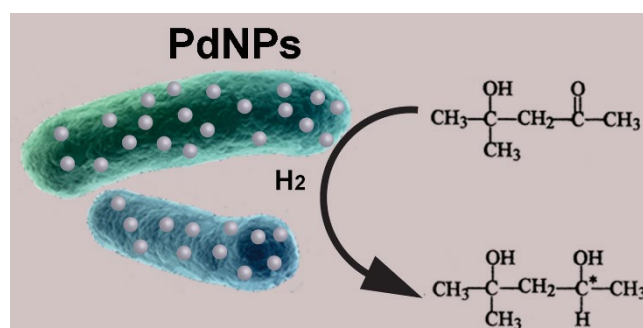

**Scheme S1.** Illustration of hydrogen-producing bacteria supported PdNPs composites for asymmetric C=C hydrogenation of diacetone alcohol to (R)-2-methyl-2,4-pentenediol.

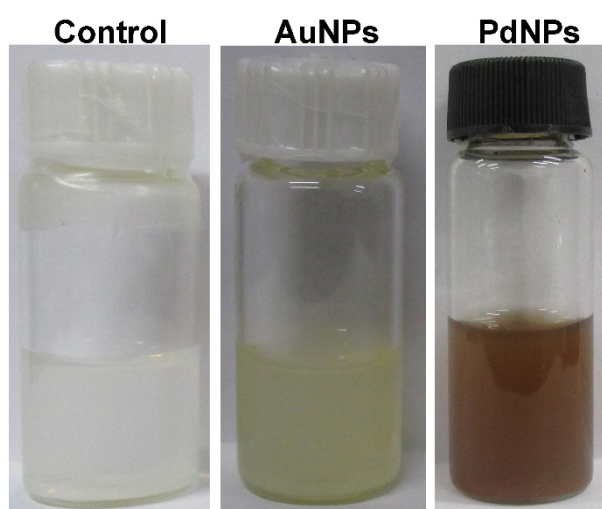

**Figure S1.** The digital photograph showed the color change of the obtained suspensions, indicating the formation of B-AuNPs and B-PdNPs nanohybrids.

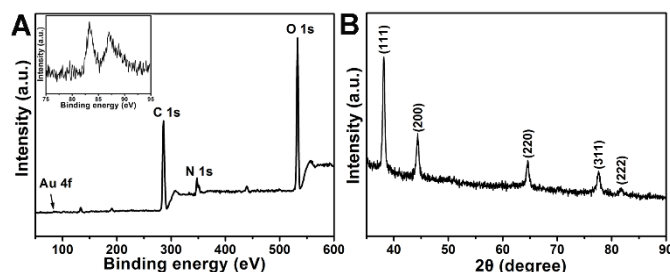

**Figure S2.** (A) XPS analysis surveys of B-AuNPs; (B) Wide-angle powder XRD pattern of B-AuNPs nanocomposites. The wide-angle X-ray diffraction pattern exhibits five peaks, which could be indexed as the (111), (200), (220), (311) and (222) reflections of the face centered cubic structure of crystalline Au<sup>0</sup>.

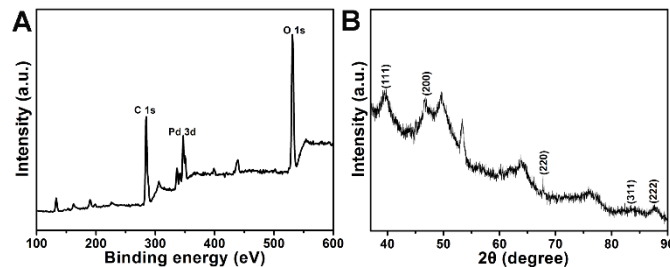

**Figure S3.** (A) XPS analysis surveys of B-PdNPs; (B) Wide-angle powder XRD pattern of B-PdNPs nanocomposites. The wide-angle X-ray diffraction pattern exhibits five peaks, which could be indexed as the (111), (200), (220), (311) and (222) reflections of the face centered cubic structure of crystalline Pd<sup>0</sup>.

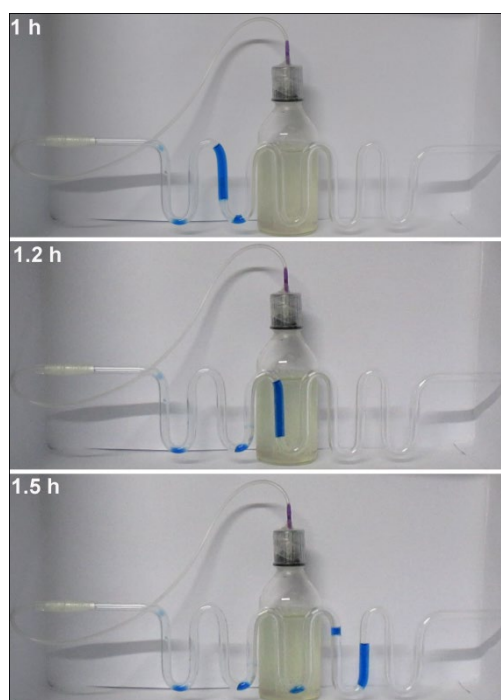

**Figure S4.** The hydrogen-producing ability of B-AuNPs.

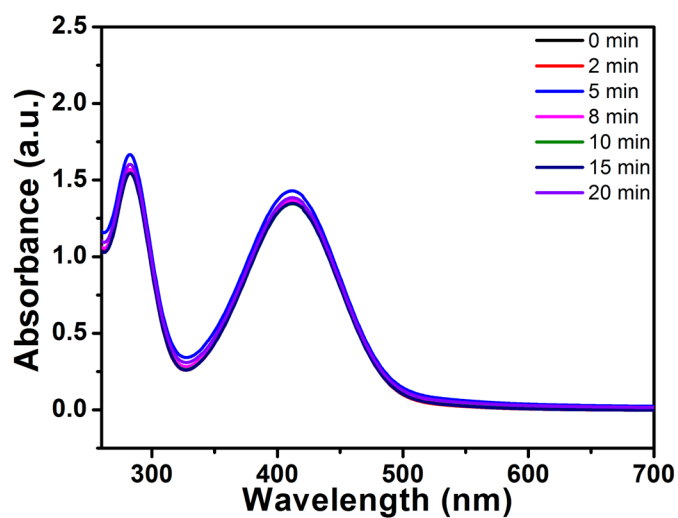

**Figure S5.** UV-vis spectra of aqueous solutions of *o*-nitroaniline and H<sub>2</sub> in the presence of AuNPs (13 nm) measured at different time intervals as control experiment.

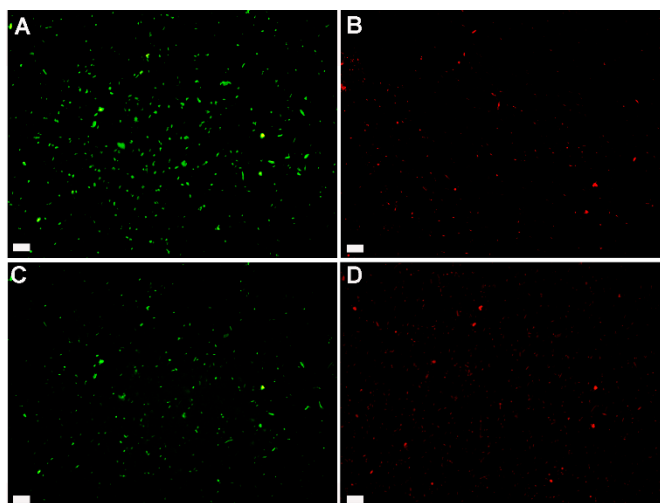

**Figure S6.** Fluorescence microscopic visualization of pristine bacteria (A, B) and B-AuNPs composites (C, D). Fluorescence microscopic visualization of adherent bacteria after adoption of the different live/dead stainings: FDA/PI. Under fluorescence microscopy, green and red stains indicate viable and dead cells, respectively, scale bar = 10  $\mu\text{m}$ .

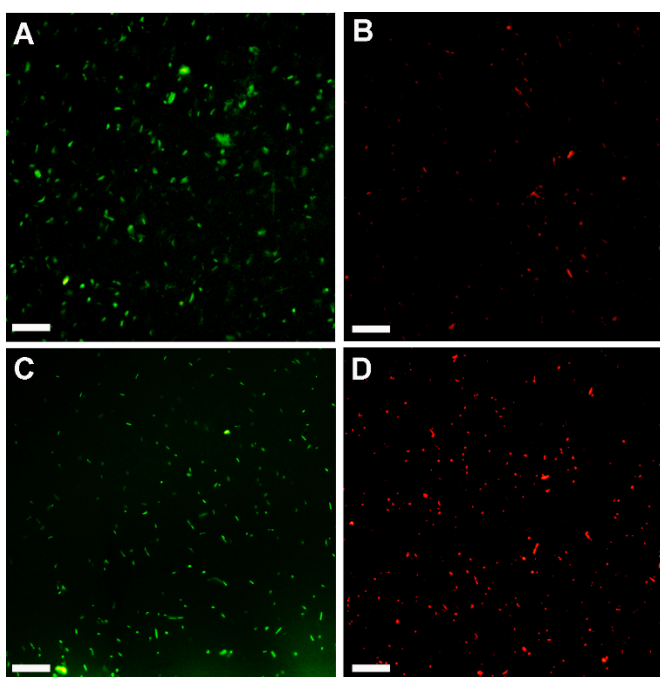

**Figure S7.** Fluorescence microscopic visualization of pristine bacteria (A, B) and B-PdNPs composites (C, D). Fluorescence microscopic visualization of adherent bacteria after adoption of the different live/dead staining: FDA/PI. Under fluorescence microscopy, green and red stains indicate viable and dead cells, respectively, scale bar = 10  $\mu\text{m}$ .

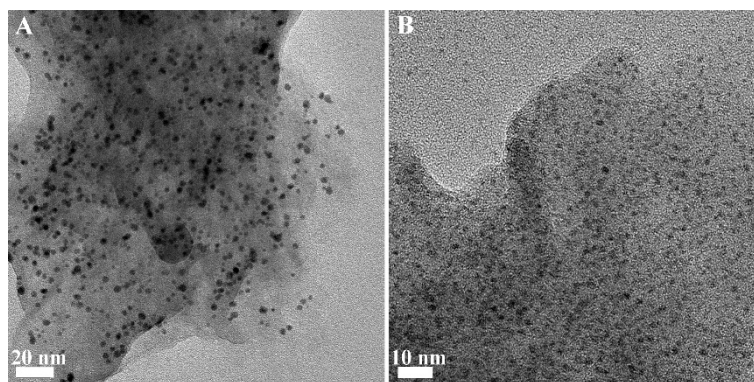

**Figure S8.** TEM of (A) B-AuNPs and (B) B-PdNPs after catalytic process.
